# Supplementary material for: Lack of LTβR Increases Susceptibility of IPEC-J2 Cells to Porcine Epidemic Diarrhea Virus
Source: Cells. 2018 Nov 21;7(11):222. doi: 10.3390/cells7110222 (PMC6262443; doi:10.3390/cells7110222)
Supplement: Supplementary file 1 [file cells-07-00222-s001.pdf]

WT 5'- CCCCTTGAAGGTGCTCCCTTACC GCCCGAGAGAACCAACCTGCCAGGACCAGAAAAGGGAGTACTACGAGCCCAACATCACGTCTGCTG -3'

1-10# CCCCTTGAAGGTGCTCCCTTA : CGCCCGAGAGAACCAACCTGCCAGGACCAGAAAAGGGAGTACTACGAGCCCAACATCACGTCTGCTG -1 bp  
 CCCCTTGAAGGTGCTCCCTTA : CGCCCGAGAGAACCAACCTGCCAGGACCAGAAAAGGGAGTACT : : : : : ACGTCTGCTG -16bp

1-19# CCCCTTGAAGGTGCTCCCTTACC : CGCCCGAGAGAACCAACCTA : CCAAGGACCAGAAAAGGGAGTACTACGAGCCCAACATCACGTCTGCTG +2 bp  
 CCCCTTGAAGGTGCTCCCTTACC : CGCCCGAGAGAACCAACCTA : CCAAGGACCAGAAAAGGGAGTACTACGAGCCCAACATCACGTCTGCTG +6 bp

1-22# CCCCTTGAAGGTGCTCCCTTAC : GCCCGAGAGAACCAACCTGCCAGGACCAGAAAAGGGAGTACTACGAGCCCAACATCACGTCTGCTG -1 bp  
 CCCCTTGAAGGTGCTCCCTTAC : GCCCGAGAGAACCAACCTGCCAGGACCAGAAAAGGGAGTACTACGAGCCCAACATCACGTCTGCTG -1 bp

2-3# CCCCTTGAAGGTGCTCCCTTAC : GCCCGAGAGAACCAACCTGCCAGGACCAGAAAAGGGAGTACTACGAGCCCAACATCACGTCTGCTG -1 bp  
 CCCCTTGAAGGTGCTCCCTTAC : GCCCGAGAGAACCAACCTGCCAGGACCAGAAAAGGGAGTACTACGAGCCCAACATCACGTCTGCTG -11 bp

6-18# CCCCTTGAAGGTGCTCCCTTAC : GCCCGAGAGAACCAACCTGCCAGGACCAGAAAAGGGAGTACTACGAGCCCAACATCACGTCTGCTG -1 bp  
 CCCCTTGAAGGTGCTCCCTTAC : GCCCGAGAGAACCAACCTGCCAGGACCAGAAAAGGGAGTACTACGAGCCCAACATCACGTCTGCTG -1 bp

**Supplementary Figure 1.** To validate the biallelic mutation that we screened using the CRISPR/Cas9 technique, the cell clones 1-10#, 1-19#, 1-22#, 2-3# and 6-18# were randomly selected for DNA sequencing.

WT----MRLPWAASSCGLAWGPLMLGLCSLQAASQSQLVLPYCPENQTCQDQKREYYEPKHHVCCSRCPP  
 allele1----MRLPWAASSCGLAWGPLMLGLCSLQAASQSQLVLPYARRTKPARTRKGSTTSPNITSAARAAPQ  
 allele2----MRLPWAASSCGLAWGPLMLGLCSLQAASQSQLVLPYARRTKPARTRKGSTTS..... AARAAPQ

**Supplementary Figure 2.** Amino acid sequences from the wild-type (1-10#) and 1-19# cell clones were compared, and our results demonstrate the shifted mutation in both alleles.

Supplementary Table 1

Primers used in this study

| Gene name | Forward (5'-3')        | Reverse (5'-3')        |
|-----------|------------------------|------------------------|
| LTβR      | CACTCATGCTGGGCCTCT     | GAGCAGCAGACGTGATGTTT   |
| VCAM1     | ATCCAAGCTGCTCCAAAAGA   | GGCCCTGTGGATGGTATATG   |
| IL-22     | TTGCTCAAGTTCGTGTCGTC   | GGTCAAGCTTGCAGTGATGA   |
| IL-23     | TAGGGGTCGAGTCAGAGGTG   | GAGTGCCATCCTTGAGCTGT   |
| IL-6      | CCACCGGTCTTGTGGAGTTT   | AGTCGGGTTGTCTAGGCTGA   |
| IL-8      | TGCAAGCTTTGTTATGCAGTG  | GCCTGGTGAATTTTTGCTGT   |
| PCNA      | GATTCCACCACCATGTTTCGAG | GATTCCACCACCATGTTTCGAG |
| CASP3     | GCCATGGTGAAGAAGGAAAA   | GTCCGTCTCAATCCCACAGT   |
| TRAIL     | ACCCAAAGGCTCAACAC      | CCCACCTGAGATGGATCACT   |
| GAPDH     | GTGAAGGTCGGAGTGAACG    | CTCGCTCCTGGAAGATGGTG   |
